# Supplementary material
Source: publisher figshare collection journal article supplement (https://tandf.figshare.com/ndownloader/files/22775225)
Supplement: Supplementary file 1 [file 22775225]

**Supplementary Material**

*In-situ* approach for the synthesis of bromide bridged mercury(II) *N*‑heterocyclic carbine complexes

MUHAMMAD ATIF, HAQ NAWAZ BHATTI, MUHAMMAD ADNAN IQBAL* and YASIR JAMIL

Figure S1. Crystal packing diagram for **7**.

Figure S2. Crystal packing diagram for **8**.

Figure S3. 1H NMR spectrum of **10** in CD3CN.

Figure S4. 13C NMR spectrum of **8** in CD3CN.

Figure S5. Sample FT-IR of benzimidazolium a salt.
